# Supplementary material for: Synergistic UV and humidity response of flexible MoS2/Kapton heterointerfaces via photogenerated charge transfer
Source: Royal Society of Chemistry journal article supplement (doi:10.1039/d1tc01219c), 2021-01-01
Supplement: d1tc01219c1.pdf [file d1tc01219c1.pdf]

## Supplementary Information

### **Synergistic UV and humidity response of flexible MoS<sub>2</sub>/Kapton heterointerfaces via photogenerated charge transfer**

Mingzeng Peng\*, Xinhe Zheng\*, Chengtao Shen, Yingfeng He, Huiyun Wei, Peng  
Qiu, Yimeng Song, Feng Tian, Ye Li, Shu Wei, Zixian Wang

*Beijing Key Laboratory for Magneto-Photoelectrical Composite and Interface Science, School of  
Mathematics and Physics, University of Science and Technology Beijing, No. 30, Xueyuan Road,  
Beijing 100083, China*

\*Corresponding author: mzpeng@ustb.edu.cn, xinhezhen@ustb.edu.cn

#### **Contents:**

1. Dynamic UV response and long-time stability testing of our MoS<sub>2</sub>/Kapton heterojunction sensors
2. Time-dependent humidity response and recovery of the MoS<sub>2</sub>/Kapton heterojunction sensors

## Figures in Supplementary Information

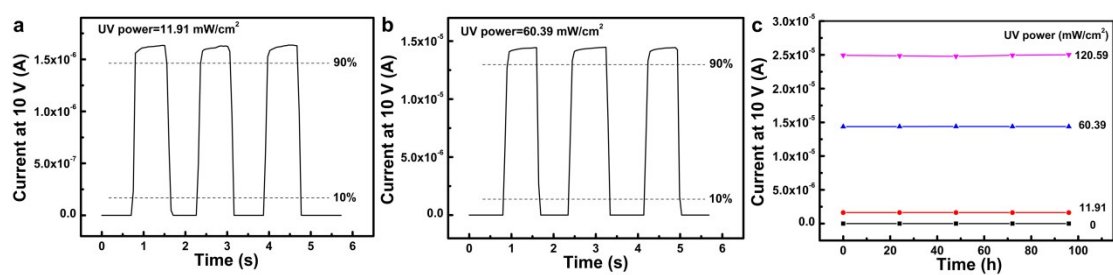

Figure S1. Dynamic UV response of the MoS<sub>2</sub>/Kapton heterojunction sensors under UV powers of (a) 11.91 mW/cm<sup>2</sup> (kink point No.1) and (b) 60.39 mW/cm<sup>2</sup> (kink point No.2), respectively. (c) Long-term stability test of its UV response under different UV powers.

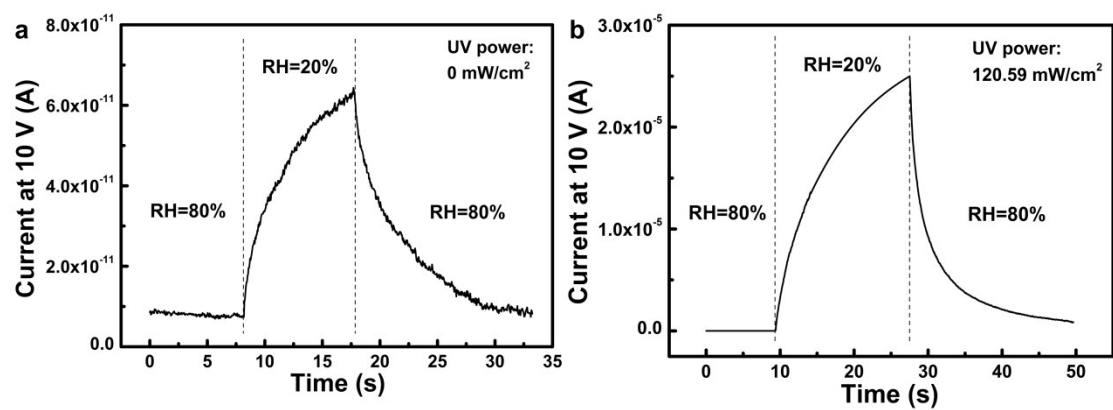

Figure S2. Dynamic humidity response of the MoS<sub>2</sub>/Kapton heterojunction sensors under UV powers of (a) 0 and (b) 120.59 mW/cm<sup>2</sup>, respectively.
